# Supplementary material for: Ordered multimodal porous carbon with hierarchical nanostructure for high Li storage capacity and good cycling performance
Source: Royal Society of Chemistry journal article supplement (doi:10.1039/c0jm01387k), 2010-01-01
Supplement: c0jm01387k.pdf [file c0jm01387k.pdf]

## Ordered multimodal porous carbon with hierarchical nanostructure for high Li storage capacity and good cycling performance†

Baizeng Fang, Min-Sik Kim, Jung Ho Kim, Sinmuk Lim and Jong-Sung Yu\*

*Department of Advanced Materials Chemistry, BK21 Research Team, Korea University,*

*208 Seochang, Jochiwon, ChungNam 339-700, Republic of Korea*

### Supporting Information

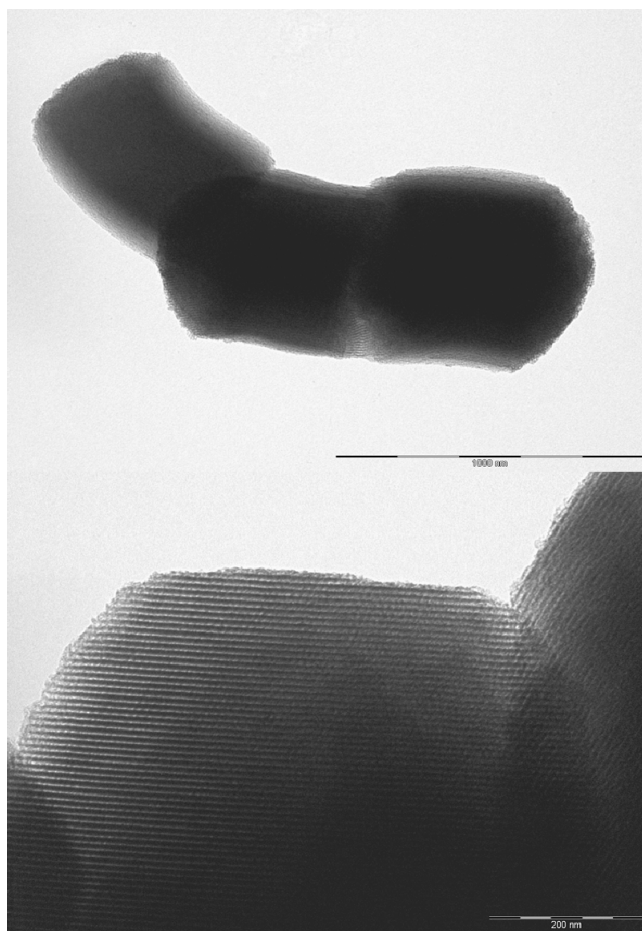

**Fig. S1.** Representative TEM images for CMK-3.

---

\*To whom correspondence should be addressed. E-mail: [jsyu212@korea.ac.kr](mailto:jsyu212@korea.ac.kr)

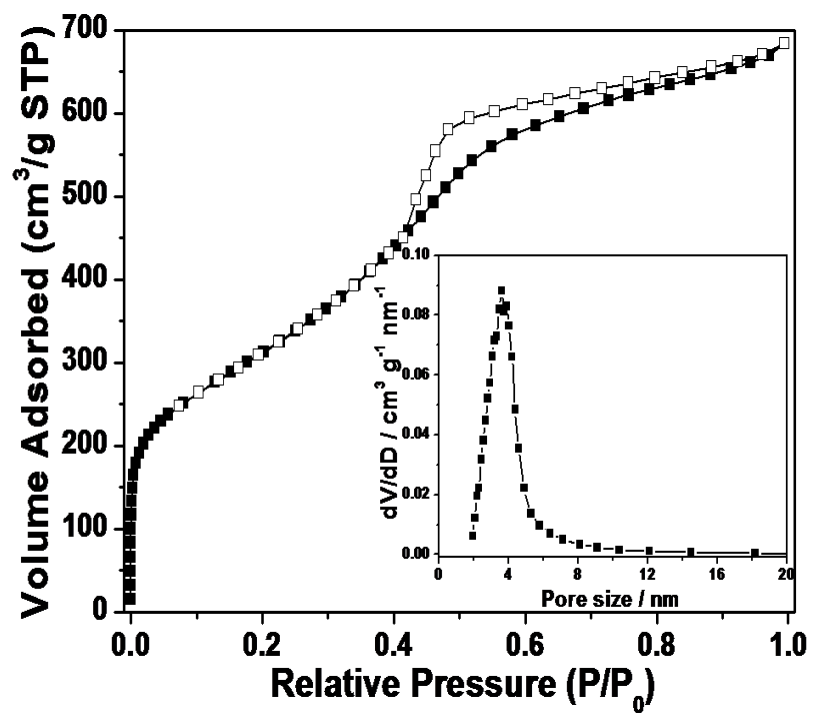

Fig. S2. Typical nitrogen adsorption-desorption isotherms at -196 °C and the derived PSD for CMK-3.

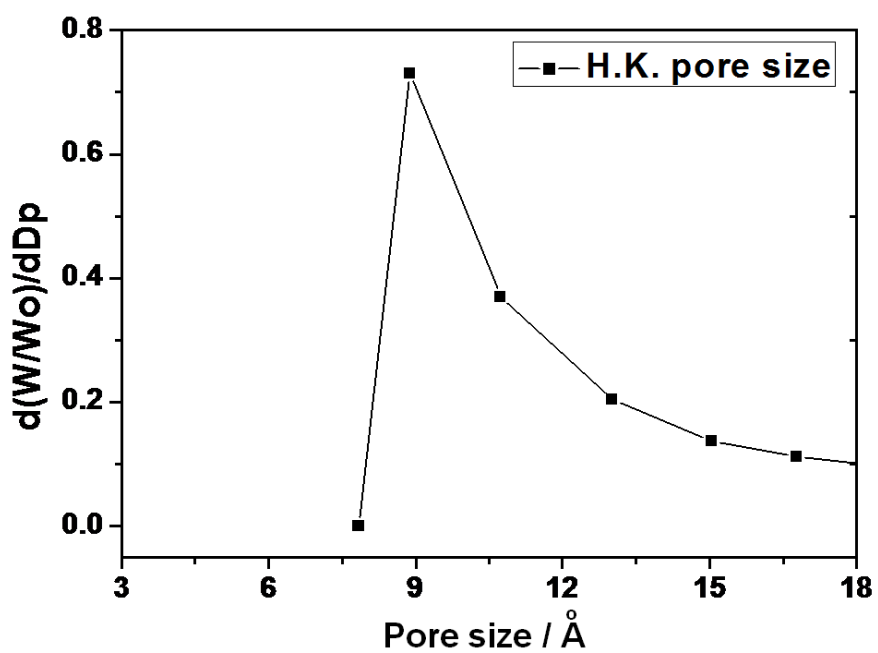

Fig. S3. Micropore size distribution curve of OMPC obtained by using the Horvath-Kawazoe method

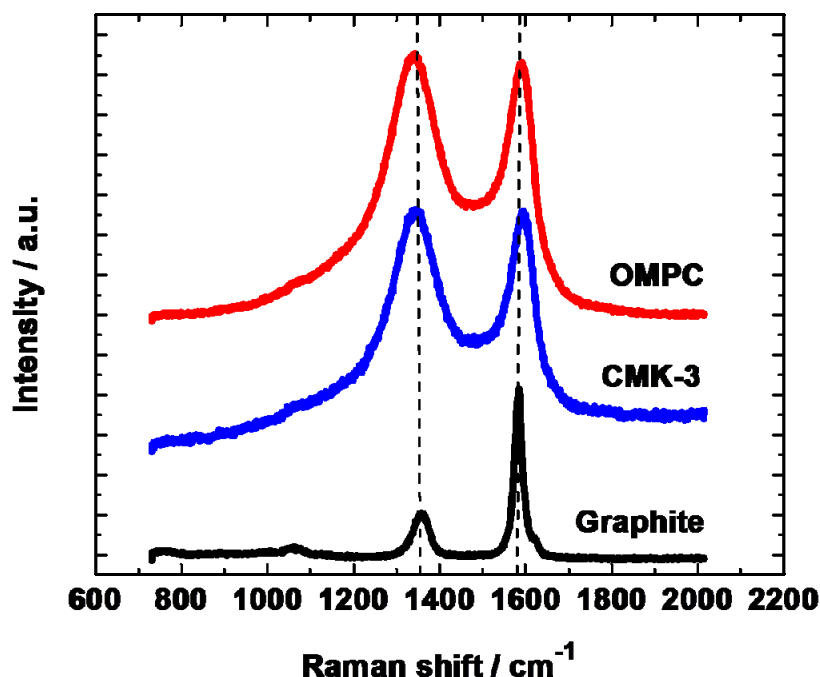

Fig. S4. Micro-Raman scattering spectra for various carbon materials.

Table S1. The derived parameters from the Raman spectra shown in Fig. S4 for various carbon materials.

| Material | FWHM / $\text{cm}^{-1}$           |                                   | $I_D/I_G$ |
|----------|-----------------------------------|-----------------------------------|-----------|
|          | D band ( $1358 \text{ cm}^{-1}$ ) | G band ( $1583 \text{ cm}^{-1}$ ) |           |
| Graphite | 45                                | 20                                | 0.366     |
| OMPC     | 167                               | 98                                | 1.79      |
| CMK-3    | 159                               | 83                                | 1.92      |

FWHM stands for full width at half maximum, and  $I_D$  and  $I_G$  the integrated intensities of D and G bands, respectively.

Raman spectrum of the commercial graphite exhibits two well-defined and clearly separated peaks corresponding to the D and G bands of graphitic carbon (D at  $1358 \text{ cm}^{-1}$ , G at  $1583 \text{ cm}^{-1}$ ), while OMPC and CMK-3 show low and close graphitization degree compared with the commercial graphite according to their Raman spectra shown in Fig. S4 and the derived parameters listed in Table S1.

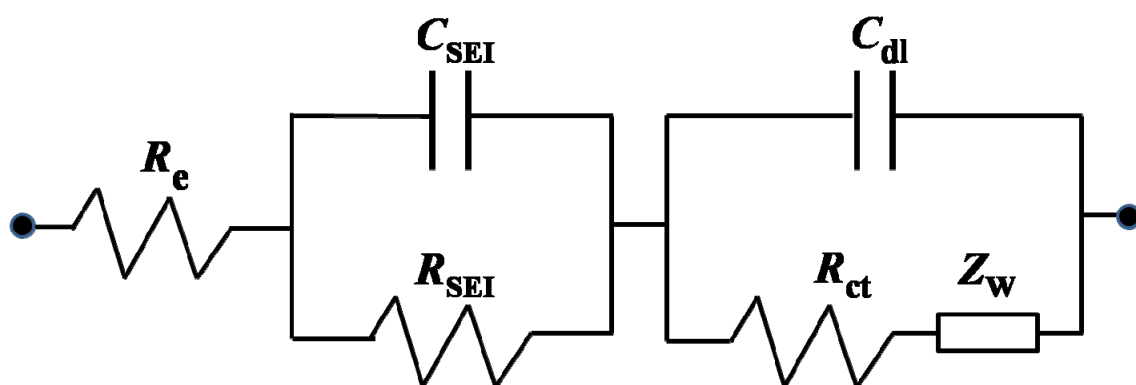

**Fig. S5.** Equivalent circuit proposed for analysis of Nyquist plots of OMPC and CMK-3 electrode/electrolyte interfaces.  $R_e$  stands for the electrolyte resistance,  $C_{SEI}$  and  $R_{SEI}$  the capacitance and resistance of the surface film, respectively,  $C_{dl}$  the double-layer capacitance,  $R_{ct}$  charge-transfer resistance, and  $Z_w$  the Warburg impedance related to the diffusion of lithium.
